# Supplementary material for: MSI2 is required for maintaining activated myelodysplastic syndrome stem cells
Source: PubMed Central journal article supplement (PMC4764878; doi:10.1038/ncomms10739), 2016-02-22
Supplement: ncomms10739-s1.pdf [file ncomms10739-s1.pdf]

**Supplementary Figure 1: MSI2 is expressed in MDS and predicts poor survival.**

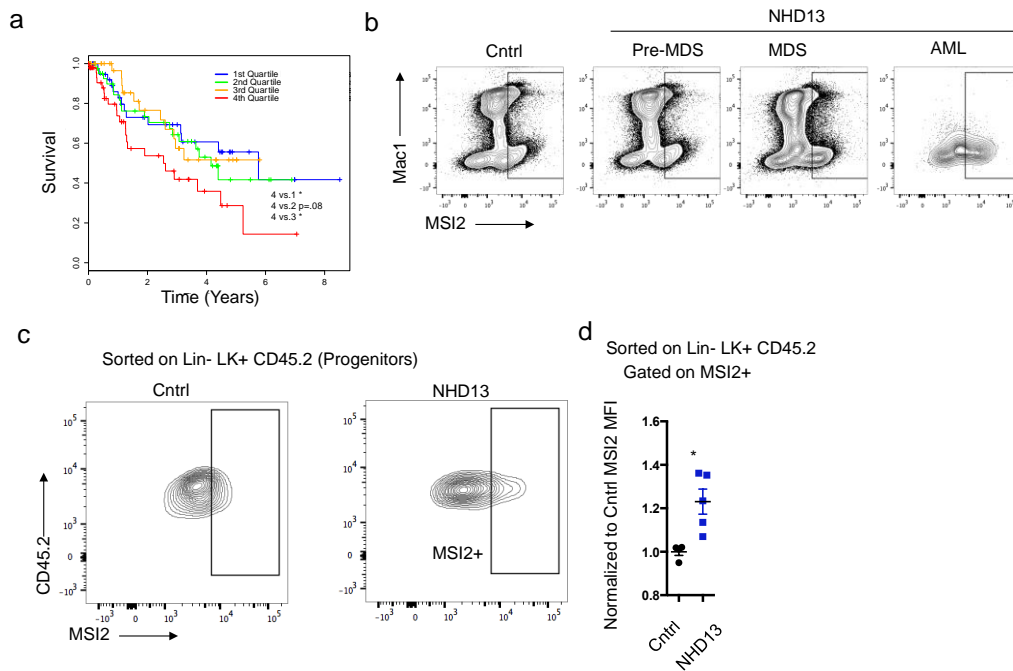

**(a)** Overall survival in MDS patients stratified by *MSI2* expression with quartiles (same patients as in **(Fig. 1b)**). **(b)** Intracellular staining for *Msi2* and *Mac1* in primary transplanted animals representative gating for Figure 1e – gate indicates “*Msi2* positives.” **(c)** Representative gating for sorted progenitors (LK+) from control or NHD13+ transplanted mice after 3 months before MDS disease and then stained for *MSI2*. **(d)** Summarized flow analysis based on gating in **(c)**, Control (n=4) and NHD13 (n=5) individual animals. Data in **a**, **b** \* $p < 0.05$  log rank and Student’s *t*-test respectively **b**, horizontal line is the mean  $\pm$  s.e.m.

## Supplementary Figure 2: *Msi2* is required to maintain MDS.

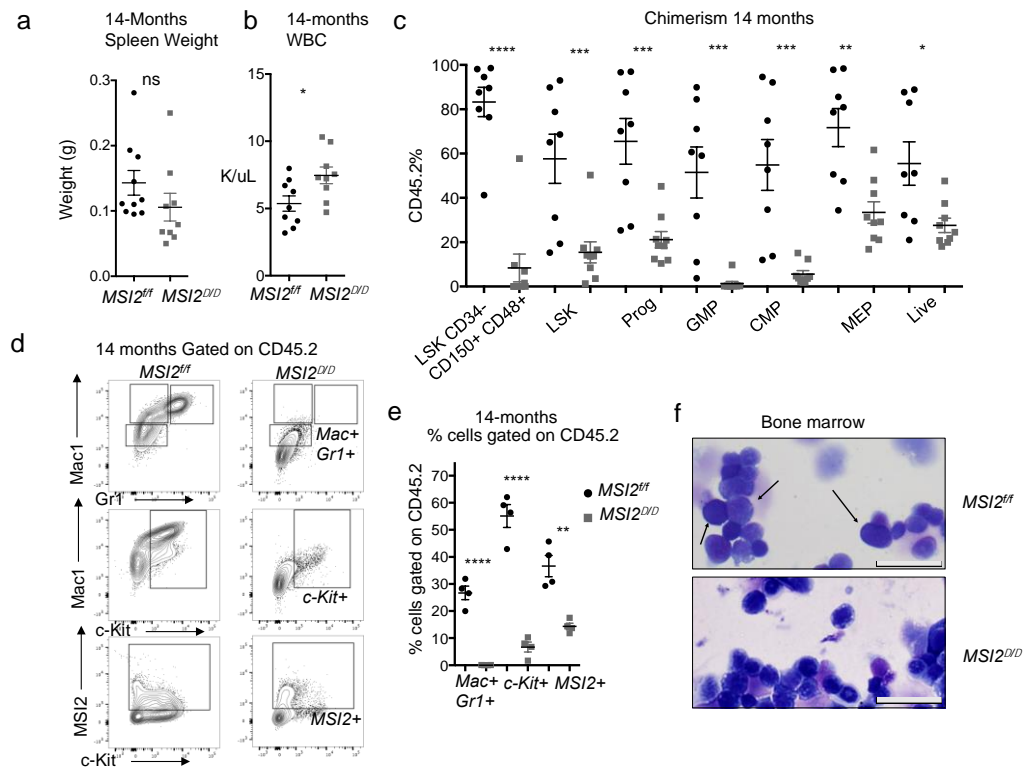

**(a-f)** Transplanted mice same as **Fig. 2**, mice were analyzed at 14-months post engraftment. **(a)** Spleen weights (*NHD13Msi2<sup>ff</sup>* n=10, *NHD13/Msi2<sup>Δ/Δ</sup>Mx1-Cre* n=9). **(b)** White blood cells. (*NHD13Msi2<sup>ff</sup>* n=9, *NHD13/Msi2<sup>Δ/Δ</sup>Mx1-Cre* n=9), **(c)** CD45.2 chimerism ( *NHD13Msi2<sup>ff</sup>* n=8, *NHD13/Msi2<sup>Δ/Δ</sup>Mx1-Cre* n=9). **(d)** flow cytometric analysis. **(e)** Summarized flow data based on gating from **(d)**, (*NHD13Msi2<sup>ff</sup>* n=4, *NHD13/Msi2<sup>Δ/Δ</sup>Mx1-Cre* n=4). **(f)** Representative cytopins from the bone marrow and stained with Wright-Giemsa. Control mice have evidence of acute leukemia with a predominance of proerythroblasts (small black arrows) and *Msi2* knockout transplanted animals have normal trilineage differentiation and no detectable blasts. White bars indicate 600x magnification with 25  $\mu$ m. Data in **a-c** and **e**, ns; not significant \*p<0.05, \*\*p<0.01, \*\*\*p<0.001, Student's *t*-test and horizontal line is the mean  $\pm$  s.e.m.

**Supplementary Figure 3: NHD13/MSI2 mice develop an aggressive myeloid diseases that is MSI2 dependent.**

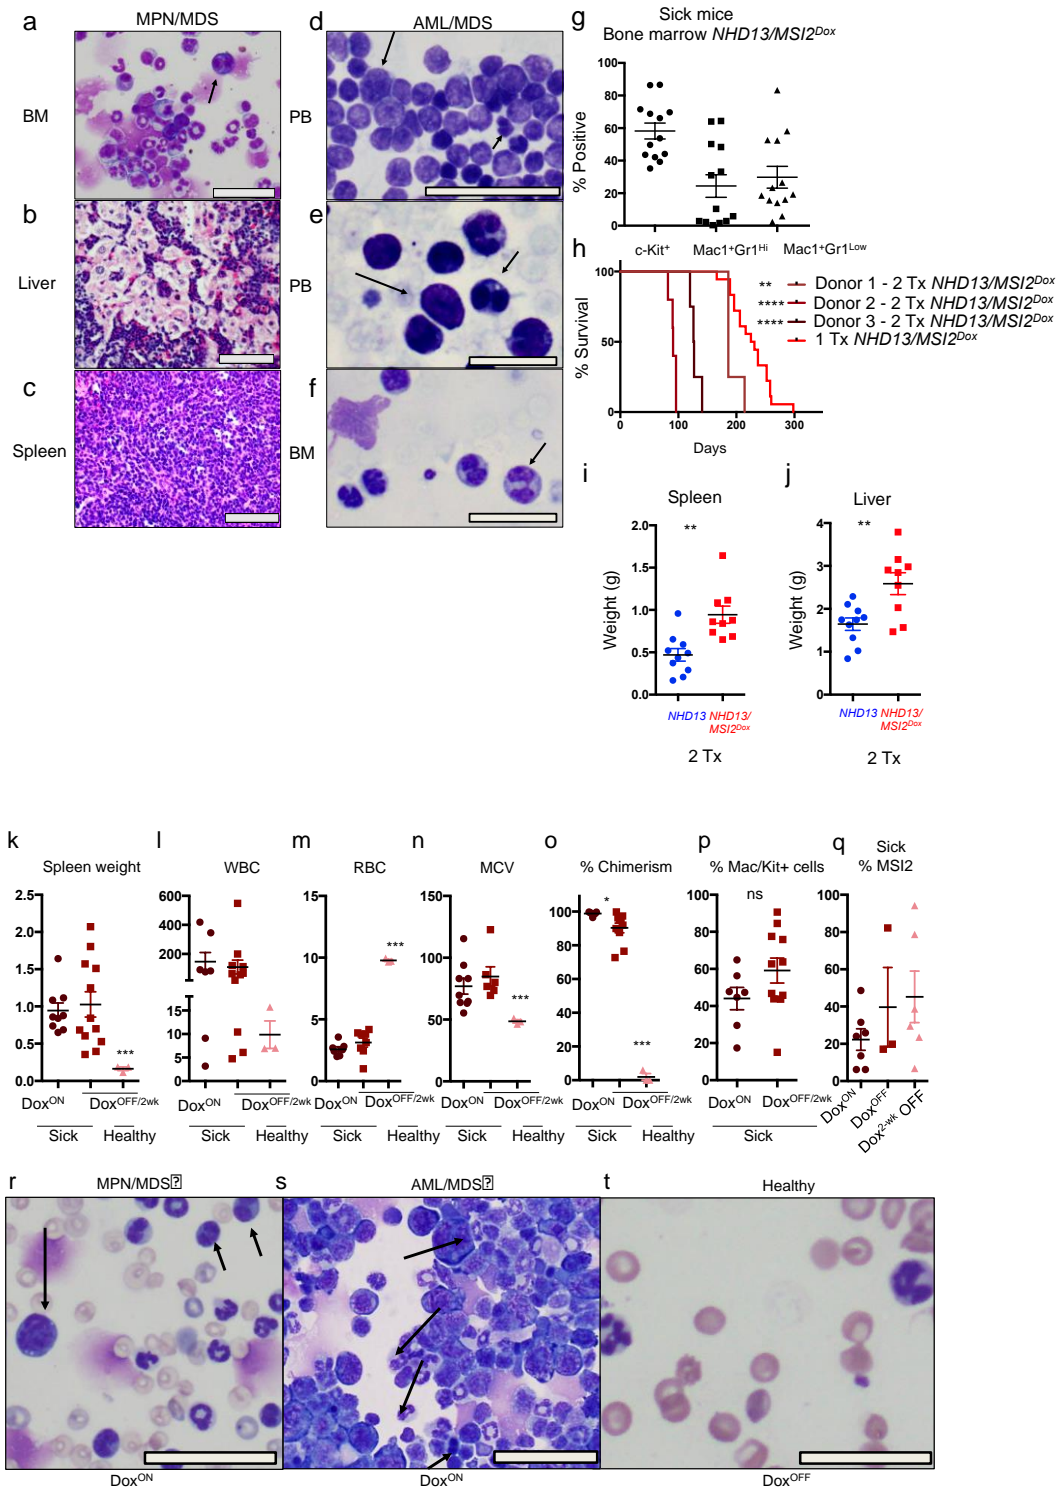

**(a-f)** Representative images from NHD13/MSI2<sup>Dox</sup> moribund mice stained with Wright-Giemsa (peripheral blood and bone marrow cytopins) and Hematoxylin and Eosin (liver and spleen) demonstrating MPN/MDS (4 out of 12 histologically analyzed) and acute myeloid leukemia (8 out of 12). **(a)** NHD13/MSI2<sup>Dox</sup> bone marrow cytopsin indicating myeloid hyperplasia and dyserythropoiesis characterized by binucleate erythroid progenitors (short black arrow) from a mouse that died from an MPN/MDS. **(b-c)** Spleen and liver pathology from the same mouse in **(a)**. The liver shows infiltration of the sinusoids by extramedullary hematopoiesis with dysplastic erythroid progenitors noted, and the spleen has infiltration of the red pulp by extramedullary hematopoiesis with dysplastic erythroid progenitors noted. **(d)** AML/MDS; peripheral blood smear indicates many circulating blasts (large black arrow), and dysplastic features characterized by binucleate erythroid progenitors (short black arrow), **(a-d)** White bar indicate 400x magnification with 50  $\mu$ m. **(e)** Another representative mouse with AML/MDS, peripheral blood smear shows circulating blasts (black arrow), binucleate erythroid progenitors (short black arrow), and **(f)** Same mouse as in **(e)** with a hyposegmented neutrophil (pseudo-Pelger Huet neutrophil) (black arrow). White bar indicate 600x magnification with 25  $\mu$ m. **(g)** Flow cytometric analysis and immunophenotype of all the mice analyzed that succumbed to hematologic disease from the NHD13/MSI2<sup>Dox</sup> animals described in **Fig. 3**, (n=13 mice analyzed at endpoint). **(h)** Survival analysis of primary transplanted mice (n=18) and secondary transplant donors 1, 2 and 3 (n=4, n=4 and n=5). **(i-j)** Spleen and liver weights from secondary transplanted animals from NHD13; n=10 combined from three independent donors, NHD13/MSI2<sup>DOX</sup>; n=9. **(k-s)** Data from secondary transplants that were either Dox<sup>ON/OFF</sup> experiments, **Fig. 3l-p**. **(k)** Spleen weights from moribund Dox<sup>ON</sup> (n=9), Dox<sup>OFF/OFF2wk</sup> (n=12) and healthy (n=3), **(l)** White blood cells (WBC), moribund Dox<sup>ON</sup> (n=7), Dox<sup>OFF/OFF2wk</sup> (n=11) and healthy mice (n=3), **(m)** red blood cell (RBC), moribund Dox<sup>ON</sup> (n=7), Dox<sup>OFF/OFF2wk</sup> (n=8) and healthy (n=3), **(n)** mean corpuscular volume (MCV), moribund Dox<sup>ON</sup> (n=9), Dox<sup>OFF/OFF2wk</sup> (n=6) and healthy mice (n=3), **(o)** CD45.2 donor/disease chimerism moribund Dox<sup>ON</sup> (n=7), Dox<sup>OFF/OFF2wk</sup> (n=10) and healthy mice (n=3). **(p)** Moribund Dox<sup>ON</sup> (n=7) and Dox<sup>OFF/OFF2wk</sup> (n=11), Mac/Kit double positive cells low or no donor chimerism in the healthy mice. **(q)** Flow cytometric analysis for MSI2 percent positivity gated on donor cells in moribund mice Dox<sup>ON</sup> (n=7), Dox<sup>OFF</sup> (n=3) and Dox<sup>2-wk OFF</sup> (n=6). **(r)** Peripheral blood smear stained with Wright-Giemsa showing MPN/MDS in Dox<sup>ON</sup> mice. **(s)** Bone marrow cytopsin stained with Wright-Giemsa showing AML/MDS in Dox<sup>ON</sup> mice shows increased blasts dyserythropoiesis characterized by binucleate erythroid progenitors (short black arrows). **(t)** Peripheral blood smear from healthy Dox<sup>OFF</sup> mouse. **(r-t)** White bar indicate 600x magnification with 50  $\mu$ m **(r)** and 1000x magnification with 25  $\mu$ m **(s)**. Data in **h-j** and **k-q**, ns; not significant \*p<0.05, \*\*p<0.01, \*\*\*p<0.001, **h** calculated with log rank test, all other data analyzed with student's *t*-test and horizontal line is the mean  $\pm$  s.e.m.

# Supplementary Figure 4: Increased stem and myeloid progenitors cells in the NHD13/MSI2 mice after transplantation.

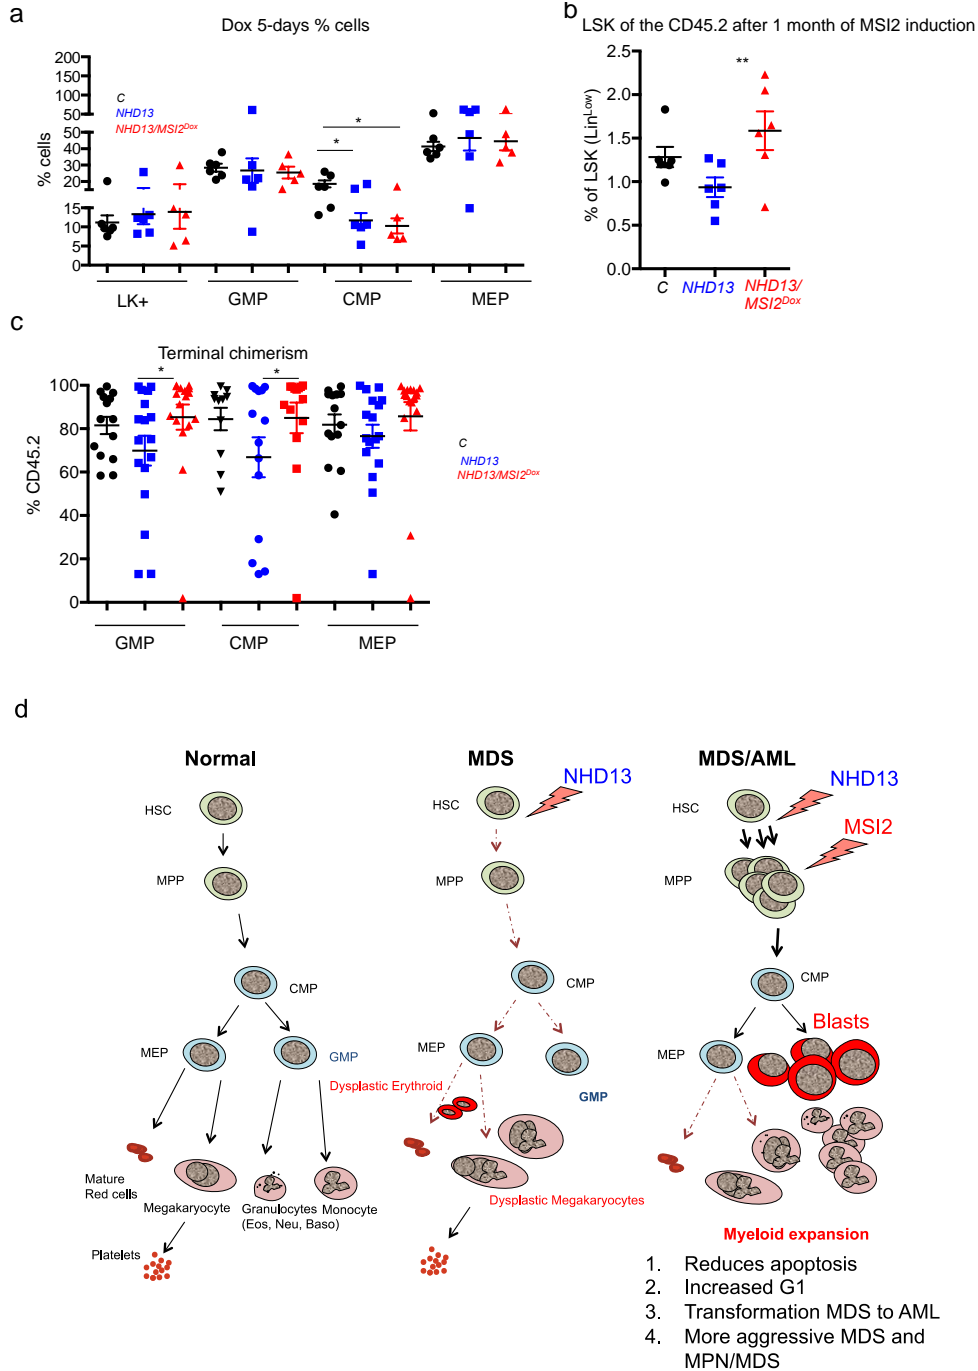

**(a)** Summarized flow cytometric analysis (Lineage<sup>low</sup> Kit<sup>+</sup>Sca1<sup>-</sup>; LK<sup>+</sup>, LK<sup>+</sup> gated; Granulocyte myeloid progenitor (GMP; CD34<sup>+</sup>,FcγRIIb<sup>+</sup>, common myeloid progenitor; CMP, CD34<sup>+</sup>,FcγRIIb<sup>mid</sup>, Megakaryocyte erythroid progenitor (MEP; CD34<sup>-</sup>,FcγRIIb<sup>low</sup>), primary animals treated with doxycycline (Dox) for five days and live and lin<sup>-</sup> gated), (C, NHD13, NHD13/MSI2, n=6, n=6 and n=5 from five independent experiments) **(b)** Frequency of the LSK cell among the lineage low-gated CD45.2 cells. (C, NHD13, NHD13/MSI2<sup>Dox</sup>; n=6, SEM and \*\*p<0.01), **(c)** Terminal chimerism from transplants in Figure 3 in the gated populations, (C, NHD13, NHD13/MSI2<sup>Dox</sup>; n=11-17 combined from two independent transplants). **(d)** In mice with NHD13 that have MDS hematopoietic development is blocked. If MSI2 is induced in the MDS mouse model, the HSPC is expanded and the mice die of an aggressive myeloid disease including leukemia. Data in **a-c** \*p<0.05, \*\*p<0.01, \*\*\*p<0.001, student's *t*-test and horizontal line is the mean ± s.e.m.

Supplementary Table 1: *MSI2* expression and correlation with mutations.

| MSI2 High expression |         |               | MSI2 Low expression |         |               |
|----------------------|---------|---------------|---------------------|---------|---------------|
| Mutation             | p-value | FDR corrected | Mutation2           | p-value | FDR corrected |
| RUNX1                | 0.01    | 0.40          | TP53                | 0.04    | 1.00          |
| SF3B1                | 0.05    | 1.00          | NRAS                | 0.09    | 1.00          |
| SRSF2                | 0.11    | 1.00          | CREBBP              | 0.09    | 1.00          |
| EZH2                 | 0.16    | 1.00          | CDKN2A              | 0.09    | 1.00          |
| ASXL1                | 0.16    | 1.00          | tri.19.             | 0.09    | 1.00          |
| TET2                 | 0.20    | 1.00          | KDM6A               | 0.18    | 1.00          |
| STAG2                | 0.20    | 1.00          | FLT3                | 0.18    | 1.00          |
| FLT3                 | 0.20    | 1.00          | rearr.3q            | 0.26    | 1.00          |
| PHF6                 | 0.29    | 1.00          | abn.17              | 0.26    | 1.00          |
| abn.17               | 0.29    | 1.00          | SF3B1               | 0.43    | 1.00          |
| tri.8.               | 0.44    | 1.00          | U2AF1               | 0.46    | 1.00          |
| U2AF1                | 0.50    | 1.00          | SRSF2               | 0.59    | 1.00          |
| DNMT3A               | 0.59    | 1.00          | TET2                | 0.68    | 1.00          |
| NRAS                 | 1.00    | 1.00          | ASXL1               | 1.00    | 1.00          |
| KRAS                 | 1.00    | 1.00          | RUNX1               | 1.00    | 1.00          |
| CREBBP               | 1.00    | 1.00          | tri.8.              | 1.00    | 1.00          |
| NF1                  | 1.00    | 1.00          | DNMT3A              | 1.00    | 1.00          |
| WT1                  | 1.00    | 1.00          | EZH2                | 1.00    | 1.00          |
| IRF1                 | 1.00    | 1.00          | IDH2                | 1.00    | 1.00          |
| CDKN2A               | 1.00    | 1.00          | STAG2               | 1.00    | 1.00          |
| ETV6                 | 1.00    | 1.00          | ZRSR2               | 1.00    | 1.00          |
| SH2B3                | 1.00    | 1.00          | CBL                 | 1.00    | 1.00          |
| tri.19.              | 1.00    | 1.00          | BCOR                | 1.00    | 1.00          |
| TP53                 | 1.00    | 1.00          | JAK2                | 1.00    | 1.00          |
| IDH2                 | 1.00    | 1.00          | CUX1                | 1.00    | 1.00          |
| ZRSR2                | 1.00    | 1.00          | IDH1                | 1.00    | 1.00          |
| CBL                  | 1.00    | 1.00          | KRAS                | 1.00    | 1.00          |
| BCOR                 | 1.00    | 1.00          | PHF6                | 1.00    | 1.00          |
| JAK2                 | 1.00    | 1.00          | EP300               | 1.00    | 1.00          |
| CUX1                 | 1.00    | 1.00          | GATA2               | 1.00    | 1.00          |
| IDH1                 | 1.00    | 1.00          | NPM1                | 1.00    | 1.00          |
| EP300                | 1.00    | 1.00          | MLL2                | 1.00    | 1.00          |
| GATA2                | 1.00    | 1.00          | PTPN11              | 1.00    | 1.00          |
| NPM1                 | 1.00    | 1.00          | KIT                 | 1.00    | 1.00          |
| MLL2                 | 1.00    | 1.00          | MPL                 | 1.00    | 1.00          |
| PTPN11               | 1.00    | 1.00          | NF1                 | 1.00    | 1.00          |
| KIT                  | 1.00    | 1.00          | WT1                 | 1.00    | 1.00          |
| MPL                  | 1.00    | 1.00          | IRF1                | 1.00    | 1.00          |
| RAD21                | 1.00    | 1.00          | RAD21               | 1.00    | 1.00          |
| ATRX                 | 1.00    | 1.00          | ATRX                | 1.00    | 1.00          |
| KDM6A                | 1.00    | 1.00          | ETV6                | 1.00    | 1.00          |
| CEBPA                | 1.00    | 1.00          | CEBPA               | 1.00    | 1.00          |
| GS                   | 1.00    | 1.00          | GS                  | 1.00    | 1.00          |
| PTEN                 | 1.00    | 1.00          | PTEN                | 1.00    | 1.00          |
| BRAF                 | 1.00    | 1.00          | SH2B3               | 1.00    | 1.00          |
| CTN1                 | 1.00    | 1.00          | BRAF                | 1.00    | 1.00          |
| rearr.3q             | 1.00    | 1.00          | CTN1                | 1.00    | 1.00          |
| del.5q.              | 1.00    | 1.00          | del.5q.             | 1.00    | 1.00          |
| del.7q.              | 1.00    | 1.00          | del.7q.             | 1.00    | 1.00          |
| del.11q.             | 1.00    | 1.00          | del.11q.            | 1.00    | 1.00          |
| del.12p.             | 1.00    | 1.00          | del.12p.            | 1.00    | 1.00          |
| del.20q.             | 1.00    | 1.00          | del.20q.            | 1.00    | 1.00          |
| del.Y.               | 1.00    | 1.00          | del.Y.              | 1.00    | 1.00          |

**Supplementary Table 2: Geneset enrichment analysis from RNA-seq positively correlated NHD13 vs. NHD13/MSI2 (upregulated).**

| <b>GENESET NAME:</b>                                                                                     | <b># of genes</b> | <b>ES</b> | <b>NES</b> | <b>NOM p-val</b> | <b>FDR q-val</b> |
|----------------------------------------------------------------------------------------------------------|-------------------|-----------|------------|------------------|------------------|
| <b>CROONQUIST_NRAS_SIGNALING_UP</b>                                                                      | 29                | 0.68      | 1.99       | 0.00             | 0.15             |
| <b>VALK_AML_CLUSTER_9</b>                                                                                | 19                | 0.75      | 1.94       | 0.00             | 0.19             |
| <b>WANG_TUMOR_INVASIVENESS_DN</b>                                                                        | 179               | 0.46      | 1.91       | 0.00             | 0.19             |
| <b>PID_SYNDECAN_1_PATHWAY</b>                                                                            | 15                | 0.76      | 1.90       | 0.00             | 0.16             |
| <b>CROMER_TUMORIGENESIS_UP</b>                                                                           | 17                | 0.73      | 1.89       | 0.00             | 0.15             |
| <b>EINAV_INTERFERON_SIGNATURE_IN_CANCER</b>                                                              | 23                | 0.69      | 1.88       | 0.00             | 0.15             |
| <b>ZHAN_MULTIPLE_MYELOMA_LB_DN</b>                                                                       | 29                | 0.64      | 1.85       | 0.00             | 0.19             |
| <b>REACTOME_AMYLOIDS</b>                                                                                 | 31                | 0.60      | 1.85       | 0.00             | 0.18             |
| <b>PID_ER_NONGENOMIC_PATHWAY</b>                                                                         | 27                | 0.65      | 1.82       | 0.00             | 0.22             |
| <b>KEGG_SYSTEMIC_LUPUS_ERYTHEMATOSUS</b>                                                                 | 48                | 0.54      | 1.81       | 0.00             | 0.24             |
| <b>REACTOME_SIGNALING_BY_FGFR_MUTANTS</b>                                                                | 22                | 0.66      | 1.80       | 0.00             | 0.23             |
| <b>KIM_LRRC3B_TARGETS</b>                                                                                | 14                | 0.74      | 1.80       | 0.00             | 0.22             |
| <b>BROWNE_HCMV_INFECTION_4HR_UP</b>                                                                      | 31                | 0.60      | 1.79       | 0.00             | 0.24             |
| <b>REACTOME_NUCLEOTIDE_BINDING_DOMAIN_LEUCINE_RICH_REPEAT_CONTAINING_RECEPTOR_NLR_SIGNALING_PATHWAYS</b> | 39                | 0.57      | 1.78       | 0.00             | 0.24             |



**Supplementary Table 3: Geneset enrichment analysis from RNA-seq negatively correlated NHD13 vs. NHD13/MSI2 (downregulated).**

| NAME                                                 | # of genes | ES    | NES   | NOM p-val | FDR q-val |
|------------------------------------------------------|------------|-------|-------|-----------|-----------|
| ROSS_AML_WITH_PML_RARA_FUSION                        | 42         | -0.76 | -2.06 | 0.00      | 0.00      |
| VANHARANTA_UTERINE_FIBROID_DN                        | 39         | -0.76 | -2.02 | 0.00      | 0.00      |
| HSCVSGMP_FC3_UP                                      | 92         | -0.66 | -2.00 | 0.00      | 0.00      |
| GRAHAM_NORMAL QUIESCENT_VS_NORMAL_DIVIDING_UP        | 34         | -0.72 | -1.90 | 0.00      | 0.03      |
| DELYS_THYROID_CANCER_DN                              | 83         | -0.63 | -1.87 | 0.00      | 0.05      |
| CHIANG_LIVER_CANCER_SUBCLASS_CTNNB1_UP               | 67         | -0.64 | -1.87 | 0.00      | 0.05      |
| HSCVSGMP_UP                                          | 289        | -0.56 | -1.86 | 0.00      | 0.05      |
| CHYLA_CBFA2T3_TARGETS_DN                             | 121        | -0.59 | -1.83 | 0.00      | 0.07      |
| ROSS_AML_OF_FAB_M7_TYPE                              | 48         | -0.66 | -1.82 | 0.00      | 0.07      |
| RAGHAVACHARI_PLATELET_SPECIFIC_GENES                 | 52         | -0.65 | -1.82 | 0.00      | 0.08      |
| HADDAD_T_LYMPHOCYTE_AND_NK_PROGENITOR_UP             | 43         | -0.67 | -1.81 | 0.00      | 0.08      |
| SWEET_LUNG_CANCER_KRAS_DN                            | 191        | -0.55 | -1.80 | 0.00      | 0.08      |
| HSCVSMEP_FC2_DN                                      | 41         | -0.67 | -1.78 | 0.00      | 0.11      |
| REACTOME_PLATELET_HOMEOSTASIS                        | 39         | -0.67 | -1.78 | 0.00      | 0.11      |
| CHIBA_RESPONSE_TO_TSA_DN                             | 14         | -0.80 | -1.77 | 0.00      | 0.12      |
| CAIRO_LIVER_DEVELOPMENT_UP                           | 80         | -0.59 | -1.76 | 0.00      | 0.13      |
| TONKS_TARGETS_OF_RUNX1_RUNX1T1_FUSION GRANULOCYTE_UP | 31         | -0.70 | -1.76 | 0.00      | 0.13      |
| REACTOME_AQUAPORIN_MEDIATED_TRANSPORT                | 22         | -0.73 | -1.75 | 0.00      | 0.13      |
| CUI_TCF21_TARGETS_DN                                 | 16         | -0.78 | -1.75 | 0.00      | 0.12      |
| REACTOME_NETRIN1_SIGNALING                           | 14         | -0.81 | -1.74 | 0.00      | 0.14      |
| WENG_POR_TARGETS_LIVER_UP                            | 22         | -0.74 | -1.74 | 0.00      | 0.13      |
| GUO_HEX_TARGETS_DN                                   | 44         | -0.65 | -1.73 | 0.00      | 0.15      |
| CERVERA_SDHB_TARGETS_2                               | 38         | -0.65 | -1.72 | 0.00      | 0.18      |
| VALK_AML_CLUSTER_1                                   | 15         | -0.77 | -1.71 | 0.01      | 0.20      |
| KAN_RESPONSE_TO_ARSENIC_TRIOXIDE                     | 58         | -0.60 | -1.70 | 0.01      | 0.22      |
| VALK_AML_CLUSTER_8                                   | 14         | -0.78 | -1.69 | 0.00      | 0.23      |
| VALK_AML_CLUSTER_2                                   | 15         | -0.77 | -1.69 | 0.01      | 0.23      |
| METZELER_SURVIVALSIGNATURE_POSITIVESCORE             | 22         | -0.69 | -1.68 | 0.01      | 0.25      |
| REACTOME_CLASS_B_2_SECRETIN_FAMILY_RECEPTORS         | 21         | -0.71 | -1.68 | 0.00      | 0.24      |
